# Supplementary material
Source: PubMed Central journal article supplement (PMC4256150)
Supplement: NIHMS595412-supplement-Supplementary_Material.pdf [file NIHMS595412-supplement-Supplementary_Material.pdf]

**Supplementary Table 6.** Estimated power and bias for 3 exposure-enriched sampling designs with exposure misclassification. applied based on 5000 3 methods of GxE interaction detection are simulated datasets, each including 5000 cases and 5000 controls from which 50% are selected for genotyping at a single marker. Exposure prevalence = 0.1;  $OR_{gc} = 1.0$ ;  $OR_g = 1.0$ ;  $OR_e = 1.0$ . Sensitivity (SE) of exposure measurement = Specificity (SP) of exposure measurement = 0.8.

Scheme 1: Genotype 50% of cases and 50% of controls including all E=1 and a random sample of E=0  
 Scheme 2: Genotype 50% of cases and 50% of controls including all D=1/E=1, 50% of D=0/E=1, and a random sample of E=0  
 Scheme 3: Randomly sample 50% of cases and 50% of controls for genotyping, irrespective of exposure status

| Scheme | $MA_g$ | $MA_c$ | $OR_{gxc}$ | Power      |      |      |        |                         |      |      |                         |      | Bias |            |      |      |        | Mean squared error (MSE) |            |      |      |        |        |
|--------|--------|--------|------------|------------|------|------|--------|-------------------------|------|------|-------------------------|------|------|------------|------|------|--------|--------------------------|------------|------|------|--------|--------|
|        |        |        |            | $OR_{gxc}$ |      |      | $MA_g$ | Joint $MA_g + OR_{gxc}$ |      |      | Joint $MA_c + OR_{gxc}$ |      |      | $OR_{gxc}$ |      |      | $MA_g$ | $MA_c$                   | $OR_{gxc}$ |      |      | $MA_g$ | $MA_c$ |
|        |        |        |            | CC         | CO   | EB   | CC     | CO                      | EB   | CC   | CO                      | EB   | CC   | CO         | EB   | All  | All    | CC                       | CO         | EB   | All  | All    |        |
| 1      | 1.00   | 1.00   | 1.0        | 0.05       | 0.05 | 0.04 | 0.07   | 0.05                    | 0.05 | 0.04 | 0.09                    | 0.09 | 0.08 | 0.00       | 0.00 | 0.00 | 0.00   | 0.00                     | 0.02       | 0.01 | 0.01 | 0.00   | 0.00   |
|        | 1.02   | 1.07   | 1.2        | 0.08       | 0.10 | 0.08 | 0.11   | 0.09                    | 0.11 | 0.09 | 0.14                    | 0.16 | 0.14 | 0.13       | 0.13 | 0.13 | -0.01  | 0.04                     | 0.03       | 0.02 | 0.03 | 0.01   | 0.01   |
|        | 1.04   | 1.14   | 1.4        | 0.15       | 0.24 | 0.19 | 0.22   | 0.23                    | 0.31 | 0.27 | 0.27                    | 0.35 | 0.30 | 0.23       | 0.23 | 0.23 | -0.03  | 0.07                     | 0.07       | 0.06 | 0.06 | 0.01   | 0.01   |
|        | 1.06   | 1.22   | 1.6        | 0.25       | 0.47 | 0.38 | 0.41   | 0.47                    | 0.62 | 0.55 | 0.47                    | 0.61 | 0.54 | 0.31       | 0.32 | 0.32 | -0.04  | 0.10                     | 0.12       | 0.11 | 0.11 | 0.01   | 0.01   |
|        | 1.08   | 1.29   | 1.8        | 0.40       | 0.68 | 0.56 | 0.61   | 0.72                    | 0.85 | 0.79 | 0.68                    | 0.83 | 0.77 | 0.39       | 0.39 | 0.39 | -0.05  | 0.13                     | 0.17       | 0.16 | 0.16 | 0.02   | 0.02   |
| 2      | 1.00   | 1.00   | 1.0        | 0.06       | 0.05 | 0.04 | 0.07   | 0.08                    | 0.07 | 0.07 | 1.00                    | 1.00 | 1.00 | 0.00       | 0.00 | 0.00 | 0.00   | -1.13                    | 0.02       | 0.01 | 0.01 | 0.00   | 0.00   |
|        | 1.02   | 1.07   | 1.2        | 0.09       | 0.11 | 0.08 | 0.12   | 0.12                    | 0.13 | 0.11 | 1.00                    | 1.00 | 1.00 | 0.13       | 0.13 | 0.13 | -0.01  | -1.09                    | 0.03       | 0.02 | 0.03 | 0.01   | 0.01   |
|        | 1.04   | 1.14   | 1.4        | 0.14       | 0.24 | 0.17 | 0.23   | 0.25                    | 0.33 | 0.28 | 1.00                    | 1.00 | 1.00 | 0.23       | 0.23 | 0.23 | -0.03  | -1.05                    | 0.07       | 0.06 | 0.06 | 0.01   | 0.01   |
|        | 1.06   | 1.22   | 1.6        | 0.23       | 0.45 | 0.33 | 0.41   | 0.47                    | 0.62 | 0.53 | 1.00                    | 1.00 | 1.00 | 0.32       | 0.32 | 0.32 | -0.04  | -1.03                    | 0.12       | 0.11 | 0.11 | 0.01   | 0.01   |
|        | 1.08   | 1.29   | 1.8        | 0.36       | 0.67 | 0.52 | 0.60   | 0.70                    | 0.84 | 0.77 | 1.00                    | 1.00 | 1.00 | 0.39       | 0.39 | 0.39 | -0.05  | -0.99                    | 0.17       | 0.16 | 0.16 | 0.02   | 0.02   |
| 3      | 1.00   | 1.00   | 1.0        | 0.06       | 0.05 | 0.04 | 0.05   | 0.05                    | 0.05 | 0.05 | 0.05                    | 0.05 | 0.05 | 0.00       | 0.00 | 0.00 | 0.00   | 0.00                     | 0.02       | 0.01 | 0.01 | 0.00   | 0.00   |
|        | 1.02   | 1.07   | 1.2        | 0.07       | 0.09 | 0.07 | 0.06   | 0.07                    | 0.09 | 0.07 | 0.06                    | 0.08 | 0.07 | 0.13       | 0.13 | 0.13 | 0.00   | 0.05                     | 0.03       | 0.03 | 0.03 | 0.00   | 0.00   |
|        | 1.04   | 1.14   | 1.4        | 0.12       | 0.21 | 0.15 | 0.11   | 0.14                    | 0.21 | 0.16 | 0.13                    | 0.20 | 0.15 | 0.23       | 0.23 | 0.23 | 0.00   | 0.10                     | 0.07       | 0.06 | 0.07 | 0.01   | 0.01   |
|        | 1.06   | 1.22   | 1.6        | 0.22       | 0.40 | 0.31 | 0.17   | 0.25                    | 0.40 | 0.33 | 0.24                    | 0.39 | 0.31 | 0.32       | 0.32 | 0.32 | 0.00   | 0.14                     | 0.12       | 0.11 | 0.11 | 0.01   | 0.01   |
|        | 1.08   | 1.29   | 1.8        | 0.31       | 0.58 | 0.46 | 0.26   | 0.40                    | 0.61 | 0.51 | 0.38                    | 0.59 | 0.49 | 0.39       | 0.39 | 0.39 | 0.00   | 0.17                     | 0.17       | 0.16 | 0.16 | 0.01   | 0.01   |

**Supplementary Table 7.** Estimated power and bias for Scheme 1 with exposure misclassification. 3 methods of GxE interaction detection are applied based on 5000 simulated datasets, each including 5000 cases and 5000 controls from which 50% are selected for genotyping at a single marker. Exposure prevalence = 0.1; OR<sub>ge</sub> = 1.0; OR<sub>g</sub> = 1.0; OR<sub>e</sub> = 1.0. Scheme 1: Genotype 50% of cases and 50% of controls including all E=1 and a random sample of E=0.

|                 |                 | Power            |     |                  |                 |                                          |      |      |                                          |      |      |                  |      |      |                 | Bias            |                  |       | Mean squared error (MSE) |                 |                 |      |      |      |
|-----------------|-----------------|------------------|-----|------------------|-----------------|------------------------------------------|------|------|------------------------------------------|------|------|------------------|------|------|-----------------|-----------------|------------------|-------|--------------------------|-----------------|-----------------|------|------|------|
|                 |                 | OR <sub>ge</sub> |     |                  | MA <sub>g</sub> | Joint MA <sub>g</sub> + OR <sub>ge</sub> |      |      | Joint MA <sub>e</sub> + OR <sub>ge</sub> |      |      | OR <sub>ge</sub> |      |      | MA <sub>g</sub> | MA <sub>e</sub> | OR <sub>ge</sub> |       |                          | MA <sub>g</sub> | MA <sub>e</sub> |      |      |      |
| MA <sub>g</sub> | MA <sub>e</sub> | SP               | SE  | OR <sub>ge</sub> | CC              | CO                                       | EB   | CC   | CO                                       | EB   | CC   | CO               | EB   | CC   | CO              | EB              | All              | All   | CC                       | CO              | EB              | All  | All  |      |
| 1.00            | 1.00            | 0.6              | 0.6 | 1.0              | 0.05            | 0.05                                     | 0.04 | 0.05 | 0.05                                     | 0.05 | 0.04 | 0.26             | 0.26 | 0.25 | 0.00            | 0.00            | 0.00             | 0.00  | 0.00                     | 0.03            | 0.01            | 0.02 | 0.00 | 0.00 |
| 1.02            | 1.07            |                  |     | 1.2              | 0.05            | 0.05                                     | 0.04 | 0.07 | 0.07                                     | 0.07 | 0.06 | 0.26             | 0.26 | 0.25 | 0.17            | 0.17            | 0.17             | -0.01 | 0.05                     | 0.05            | 0.04            | 0.04 | 0.00 | 0.00 |
| 1.04            | 1.14            |                  |     | 1.4              | 0.05            | 0.06                                     | 0.04 | 0.13 | 0.12                                     | 0.12 | 0.11 | 0.28             | 0.28 | 0.28 | 0.31            | 0.31            | 0.31             | -0.01 | 0.10                     | 0.12            | 0.11            | 0.11 | 0.01 | 0.01 |
| 1.06            | 1.22            |                  |     | 1.6              | 0.06            | 0.06                                     | 0.05 | 0.26 | 0.21                                     | 0.21 | 0.20 | 0.30             | 0.31 | 0.30 | 0.43            | 0.43            | 0.43             | -0.02 | 0.14                     | 0.21            | 0.20            | 0.20 | 0.01 | 0.01 |
| 1.08            | 1.29            |                  |     | 1.8              | 0.06            | 0.08                                     | 0.06 | 0.40 | 0.33                                     | 0.34 | 0.33 | 0.31             | 0.33 | 0.31 | 0.53            | 0.53            | 0.53             | -0.02 | 0.18                     | 0.30            | 0.29            | 0.30 | 0.01 | 0.01 |
| 1.00            | 1.00            | 0.6              | 0.8 | 1.0              | 0.05            | 0.05                                     | 0.04 | 0.05 | 0.05                                     | 0.05 | 0.04 | 0.32             | 0.32 | 0.31 | 0.00            | 0.00            | 0.00             | 0.00  | 0.00                     | 0.03            | 0.02            | 0.02 | 0.00 | 0.00 |
| 1.02            | 1.07            |                  |     | 1.2              | 0.05            | 0.06                                     | 0.04 | 0.09 | 0.08                                     | 0.08 | 0.08 | 0.34             | 0.34 | 0.34 | 0.15            | 0.15            | 0.15             | -0.01 | 0.02                     | 0.06            | 0.04            | 0.05 | 0.00 | 0.00 |
| 1.04            | 1.14            |                  |     | 1.4              | 0.06            | 0.07                                     | 0.06 | 0.19 | 0.16                                     | 0.17 | 0.16 | 0.41             | 0.40 | 0.40 | 0.29            | 0.28            | 0.28             | -0.03 | 0.03                     | 0.11            | 0.10            | 0.10 | 0.01 | 0.01 |
| 1.06            | 1.22            |                  |     | 1.6              | 0.07            | 0.09                                     | 0.07 | 0.37 | 0.30                                     | 0.32 | 0.30 | 0.47             | 0.48 | 0.47 | 0.39            | 0.39            | 0.39             | -0.04 | 0.04                     | 0.18            | 0.17            | 0.17 | 0.01 | 0.01 |
| 1.08            | 1.29            |                  |     | 1.8              | 0.08            | 0.11                                     | 0.09 | 0.57 | 0.49                                     | 0.51 | 0.50 | 0.55             | 0.56 | 0.55 | 0.48            | 0.48            | 0.48             | -0.05 | 0.05                     | 0.27            | 0.25            | 0.25 | 0.02 | 0.02 |
| 1.00            | 1.00            | 0.6              | 1.0 | 1.0              | 0.05            | 0.05                                     | 0.04 | 0.05 | 0.05                                     | 0.05 | 0.04 | 0.41             | 0.41 | 0.41 | 0.01            | 0.00            | 0.00             | 0.00  | 0.00                     | 0.05            | 0.02            | 0.03 | 0.00 | 0.00 |
| 1.02            | 1.07            |                  |     | 1.2              | 0.05            | 0.05                                     | 0.04 | 0.10 | 0.09                                     | 0.09 | 0.08 | 0.43             | 0.44 | 0.43 | 0.14            | 0.14            | 0.14             | -0.02 | -0.04                    | 0.07            | 0.05            | 0.05 | 0.01 | 0.01 |
| 1.04            | 1.14            |                  |     | 1.4              | 0.06            | 0.07                                     | 0.06 | 0.27 | 0.21                                     | 0.21 | 0.20 | 0.55             | 0.55 | 0.54 | 0.25            | 0.25            | 0.25             | -0.04 | -0.11                    | 0.12            | 0.09            | 0.10 | 0.01 | 0.01 |
| 1.06            | 1.22            |                  |     | 1.6              | 0.08            | 0.10                                     | 0.08 | 0.50 | 0.42                                     | 0.44 | 0.43 | 0.66             | 0.68 | 0.67 | 0.35            | 0.34            | 0.35             | -0.06 | -0.18                    | 0.18            | 0.15            | 0.16 | 0.02 | 0.02 |
| 1.08            | 1.29            |                  |     | 1.8              | 0.09            | 0.12                                     | 0.10 | 0.74 | 0.67                                     | 0.68 | 0.67 | 0.81             | 0.82 | 0.81 | 0.43            | 0.43            | 0.43             | -0.08 | -0.30                    | 0.25            | 0.22            | 0.23 | 0.03 | 0.03 |
| 1.00            | 1.00            | 0.8              | 0.6 | 1.0              | 0.05            | 0.05                                     | 0.04 | 0.05 | 0.05                                     | 0.05 | 0.04 | 0.09             | 0.09 | 0.08 | 0.00            | 0.00            | 0.00             | 0.00  | 0.00                     | 0.01            | 0.01            | 0.01 | 0.00 | 0.00 |
| 1.02            | 1.07            |                  |     | 1.2              | 0.07            | 0.08                                     | 0.06 | 0.08 | 0.08                                     | 0.09 | 0.08 | 0.12             | 0.13 | 0.12 | 0.14            | 0.14            | 0.14             | -0.01 | 0.05                     | 0.03            | 0.03            | 0.03 | 0.00 | 0.00 |
| 1.04            | 1.14            |                  |     | 1.4              | 0.10            | 0.15                                     | 0.11 | 0.18 | 0.17                                     | 0.20 | 0.17 | 0.17             | 0.20 | 0.18 | 0.26            | 0.26            | 0.26             | -0.02 | 0.09                     | 0.08            | 0.07            | 0.08 | 0.01 | 0.01 |
| 1.06            | 1.22            |                  |     | 1.6              | 0.16            | 0.26                                     | 0.20 | 0.32 | 0.33                                     | 0.41 | 0.36 | 0.27             | 0.35 | 0.31 | 0.36            | 0.36            | 0.36             | -0.03 | 0.13                     | 0.14            | 0.14            | 0.14 | 0.01 | 0.01 |
| 1.08            | 1.29            |                  |     | 1.8              | 0.22            | 0.40                                     | 0.31 | 0.49 | 0.50                                     | 0.62 | 0.57 | 0.40             | 0.52 | 0.46 | 0.45            | 0.45            | 0.45             | -0.03 | 0.17                     | 0.21            | 0.21            | 0.21 | 0.02 | 0.02 |
| 1.00            | 1.00            | 0.8              | 0.8 | 1.0              | 0.05            | 0.05                                     | 0.04 | 0.05 | 0.05                                     | 0.05 | 0.04 | 0.09             | 0.09 | 0.08 | 0.00            | 0.00            | 0.00             | 0.00  | 0.00                     | 0.01            | 0.01            | 0.01 | 0.00 | 0.00 |
| 1.02            | 1.07            |                  |     | 1.2              | 0.08            | 0.10                                     | 0.08 | 0.10 | 0.09                                     | 0.11 | 0.09 | 0.14             | 0.16 | 0.14 | 0.13            | 0.13            | 0.13             | -0.01 | 0.04                     | 0.03            | 0.02            | 0.03 | 0.00 | 0.00 |
| 1.04            | 1.14            |                  |     | 1.4              | 0.15            | 0.24                                     | 0.19 | 0.21 | 0.23                                     | 0.31 | 0.27 | 0.27             | 0.35 | 0.30 | 0.23            | 0.23            | 0.23             | -0.03 | 0.07                     | 0.07            | 0.06            | 0.06 | 0.01 | 0.01 |
| 1.06            | 1.22            |                  |     | 1.6              | 0.25            | 0.47                                     | 0.38 | 0.39 | 0.47                                     | 0.62 | 0.55 | 0.47             | 0.61 | 0.54 | 0.31            | 0.32            | 0.32             | -0.04 | 0.10                     | 0.11            | 0.11            | 0.11 | 0.01 | 0.01 |
| 1.08            | 1.29            |                  |     | 1.8              | 0.40            | 0.68                                     | 0.56 | 0.61 | 0.72                                     | 0.85 | 0.79 | 0.68             | 0.83 | 0.77 | 0.39            | 0.39            | 0.39             | -0.05 | 0.13                     | 0.16            | 0.16            | 0.16 | 0.02 | 0.02 |
| 1.00            | 1.00            | 0.8              | 1.0 | 1.0              | 0.05            | 0.05                                     | 0.04 | 0.05 | 0.05                                     | 0.05 | 0.05 | 0.11             | 0.11 | 0.10 | 0.00            | 0.00            | 0.00             | 0.00  | 0.00                     | 0.01            | 0.01            | 0.01 | 0.00 | 0.00 |
| 1.02            | 1.07            |                  |     | 1.2              | 0.09            | 0.14                                     | 0.11 | 0.11 | 0.12                                     | 0.16 | 0.13 | 0.19             | 0.21 | 0.19 | 0.11            | 0.11            | 0.11             | -0.02 | 0.03                     | 0.03            | 0.02            | 0.02 | 0.01 | 0.01 |
| 1.04            | 1.14            |                  |     | 1.4              | 0.20            | 0.37                                     | 0.28 | 0.26 | 0.32                                     | 0.45 | 0.39 | 0.40             | 0.51 | 0.45 | 0.20            | 0.20            | 0.20             | -0.04 | 0.05                     | 0.06            | 0.05            | 0.05 | 0.01 | 0.01 |
| 1.06            | 1.22            |                  |     | 1.6              | 0.38            | 0.65                                     | 0.53 | 0.52 | 0.63                                     | 0.79 | 0.72 | 0.67             | 0.81 | 0.75 | 0.28            | 0.27            | 0.28             | -0.06 | 0.07                     | 0.09            | 0.08            | 0.09 | 0.02 | 0.02 |
| 1.08            | 1.29            |                  |     | 1.8              | 0.57            | 0.85                                     | 0.74 | 0.74 | 0.86                                     | 0.96 | 0.92 | 0.88             | 0.96 | 0.92 | 0.33            | 0.34            | 0.34             | -0.08 | 0.09                     | 0.13            | 0.12            | 0.12 | 0.03 | 0.03 |
| 1.00            | 1.00            | 1.0              | 0.6 | 1.0              | 0.04            | 0.05                                     | 0.04 | 0.05 | 0.05                                     | 0.05 | 0.04 | 0.05             | 0.05 | 0.05 | 0.00            | 0.00            | 0.00             | 0.00  | 0.00                     | 0.03            | 0.02            | 0.02 | 0.00 | 0.00 |
| 1.02            | 1.07            |                  |     | 1.2              | 0.17            | 0.30                                     | 0.23 | 0.09 | 0.15                                     | 0.25 | 0.20 | 0.20             | 0.30 | 0.24 | 0.00            | 0.01            | 0.01             | -0.01 | 0.00                     | 0.03            | 0.02            | 0.02 | 0.00 | 0.00 |
| 1.04            | 1.14            |                  |     | 1.4              | 0.45            | 0.77                                     | 0.64 | 0.18 | 0.46                                     | 0.74 | 0.61 | 0.58             | 0.80 | 0.71 | 0.01            | 0.02            | 0.01             | -0.02 | 0.00                     | 0.03            | 0.01            | 0.02 | 0.01 | 0.01 |
| 1.06            | 1.22            |                  |     | 1.6              | 0.73            | 0.97                                     | 0.88 | 0.34 | 0.77                                     | 0.97 | 0.89 | 0.89             | 0.99 | 0.95 | 0.03            | 0.03            | 0.03             | -0.03 | 0.00                     | 0.03            | 0.01            | 0.02 | 0.01 | 0.01 |
| 1.08            | 1.29            |                  |     | 1.8              | 0.91            | 1.00                                     | 0.97 | 0.54 | 0.95                                     | 1.00 | 0.98 | 0.99             | 1.00 | 0.99 | 0.03            | 0.03            | 0.03             | -0.04 | -0.01                    | 0.03            | 0.01            | 0.02 | 0.02 | 0.02 |
| 1.00            | 1.00            | 1.0              | 0.8 | 1.0              | 0.05            | 0.05                                     | 0.04 | 0.06 | 0.05                                     | 0.05 | 0.04 | 0.06             | 0.06 | 0.05 | 0.00            | 0.00            | 0.00             | 0.00  | 0.00                     | 0.03            | 0.01            | 0.02 | 0.00 | 0.00 |
| 1.02            | 1.07            |                  |     | 1.2              | 0.21            | 0.37                                     | 0.29 | 0.09 | 0.20                                     | 0.32 | 0.24 | 0.25             | 0.38 | 0.31 | 0.01            | 0.01            | 0.01             | -0.02 | 0.00                     | 0.03            | 0.01            | 0.02 | 0.00 | 0.00 |
| 1.04            | 1.14            |                  |     | 1.4              | 0.57            | 0.89                                     | 0.76 | 0.23 | 0.57                                     | 0.86 | 0.74 | 0.74             | 0.92 | 0.85 | 0.01            | 0.00            | 0.00             | -0.03 | -0.01                    | 0.02            | 0.01            | 0.02 | 0.01 | 0.01 |
| 1.06            | 1.22            |                  |     | 1.6              | 0.85            | 0.99                                     | 0.94 | 0.41 | 0.89                                     | 0.99 | 0.95 | 0.97             | 1.00 | 0.99 | 0.01            | 0.01            | 0.01             | -0.05 | -0.02                    | 0.02            | 0.01            | 0.02 | 0.01 | 0.01 |
| 1.08            | 1.29            |                  |     | 1.8              | 0.96            | 1.00                                     | 0.99 | 0.64 | 0.98                                     | 1.00 | 0.99 | 1.00             | 1.00 | 1.00 | 0.02            | 0.02            | 0.02             | -0.06 | -0.02                    | 0.03            | 0.01            | 0.02 | 0.02 | 0.02 |
| 1.00            | 1.00            | 1.0              | 1.0 | 1.0              | 0.05            | 0.05                                     | 0.04 | 0.05 | 0.04                                     | 0.05 | 0.04 | 0.06             | 0.06 | 0.06 | 0.00            | 0.00            | 0.00             | 0.00  | 0.00                     | 0.02            | 0.01            | 0.01 | 0.00 | 0.00 |
| 1.02            | 1.07            |                  |     | 1.2              | 0.24            | 0.45                                     | 0.35 | 0.10 | 0.23                                     | 0.41 | 0.32 | 0.32             | 0.48 | 0.40 | 0.00            | 0.00            | 0.00             | -0.02 | -0.01                    | 0.02            | 0.01            | 0.01 | 0.00 | 0.00 |
| 1.04            | 1.14            |                  |     | 1.4              | 0.65            | 0.94                                     | 0.83 | 0.26 | 0.68                                     | 0.92 | 0.83 | 0.83             | 0.96 | 0.91 | 0.00            | 0.00            | 0.00             | -0.04 | -0.02                    | 0.02            | 0.01            | 0.01 | 0.01 | 0.01 |
| 1.06            | 1.22            |                  |     | 1.6              | 0.91            | 1.00                                     | 0.97 | 0.51 | 0.94                                     | 1.00 | 0.98 | 0.99             | 1.00 | 1.00 | 0.00            | 0.00            | 0.00             | -0.06 | -0.03                    | 0.02            | 0.01            | 0.01 | 0.02 | 0.02 |
| 1.08            | 1.29            |                  |     | 1.8              | 0.99            | 1.00                                     | 1.00 | 0.75 | 1.00                                     | 1.00 | 1.00 | 1.00             | 1.00 | 1.00 | 0.00            | 0.00            | 0.00             | -0.08 | -0.03                    | 0.02            | 0.01            | 0.01 | 0.03 | 0.03 |

**Supplementary Table 8.** Estimated power and bias for Scheme 2 with exposure misclassification. 3 methods of GxE interaction detection are applied based on 5000 simulated datasets, each including 5000 cases and 5000 controls from which 50% are selected for genotyping at a single marker. Exposure prevalence = 0.1;  $OR_{ge} = 1.0$ ;  $OR_g = 1.0$ ;  $OR_e = 1.0$ . Scheme 2: Genotype 50% of cases and 50% of controls including all D=1/E=1, 50% of D=0/E=1, and a random sample of E=0.

|                 |                 | Power |     |                   |                   |      |      |                 |                                           |      |      |                                           |      | Bias |                   |      |       | Mean squared error (MSE) |                 |                   |      |      |                 |                 |
|-----------------|-----------------|-------|-----|-------------------|-------------------|------|------|-----------------|-------------------------------------------|------|------|-------------------------------------------|------|------|-------------------|------|-------|--------------------------|-----------------|-------------------|------|------|-----------------|-----------------|
| MA <sub>g</sub> | MA <sub>e</sub> | SP    | SE  | OR <sub>gxe</sub> | OR <sub>gxe</sub> |      |      | MA <sub>g</sub> | Joint MA <sub>g</sub> + OR <sub>gxe</sub> |      |      | Joint MA <sub>e</sub> + OR <sub>gxe</sub> |      |      | OR <sub>gxe</sub> |      |       | MA <sub>g</sub>          | MA <sub>e</sub> | OR <sub>gxe</sub> |      |      | MA <sub>g</sub> | MA <sub>e</sub> |
|                 |                 |       |     |                   | CC                | CO   | EB   | CC              | CO                                        | EB   | CC   | CO                                        | EB   | CC   | CO                | EB   | All   | All                      | CC              | CO                | EB   | All  | All             |                 |
| 1.00            | 1.00            | 0.6   | 0.6 | 1.0               | 0.05              | 0.05 | 0.04 | 0.07            | 0.07                                      | 0.06 | 0.06 | 1.00                                      | 1.00 | 1.00 | 0.00              | 0.00 | 0.00  | 0.00                     | -1.98           | 0.02              | 0.01 | 0.02 | 0.00            | 0.00            |
| 1.02            | 1.07            |       |     | 1.2               | 0.06              | 0.05 | 0.05 | 0.09            | 0.09                                      | 0.08 | 0.08 | 1.00                                      | 1.00 | 1.00 | 0.17              | 0.17 | 0.17  | -0.01                    | -1.94           | 0.05              | 0.04 | 0.04 | 0.00            | 0.00            |
| 1.04            | 1.14            |       |     | 1.4               | 0.06              | 0.05 | 0.05 | 0.10            | 0.14                                      | 0.13 | 0.13 | 1.00                                      | 1.00 | 1.00 | 0.30              | 0.30 | 0.30  | -0.01                    | -1.89           | 0.12              | 0.11 | 0.11 | 0.01            | 0.01            |
| 1.06            | 1.22            |       |     | 1.6               | 0.07              | 0.06 | 0.06 | 0.28            | 0.23                                      | 0.22 | 0.21 | 1.00                                      | 1.00 | 1.00 | 0.43              | 0.43 | 0.43  | -0.02                    | -1.85           | 0.20              | 0.20 | 0.20 | 0.01            | 0.01            |
| 1.08            | 1.29            |       |     | 1.8               | 0.08              | 0.08 | 0.07 | 0.41            | 0.35                                      | 0.35 | 0.34 | 1.00                                      | 1.00 | 1.00 | 0.53              | 0.53 | 0.53  | -0.02                    | -1.81           | 0.31              | 0.30 | 0.30 | 0.01            | 0.01            |
| 1.00            | 1.00            | 0.6   | 0.8 | 1.0               | 0.06              | 0.05 | 0.05 | 0.06            | 0.07                                      | 0.07 | 0.06 | 1.00                                      | 1.00 | 1.00 | 0.00              | 0.00 | 0.00  | 0.00                     | -2.24           | 0.02              | 0.02 | 0.02 | 0.00            | 0.00            |
| 1.02            | 1.07            |       |     | 1.2               | 0.06              | 0.05 | 0.05 | 0.10            | 0.09                                      | 0.09 | 0.08 | 1.00                                      | 1.00 | 1.00 | 0.15              | 0.15 | 0.15  | -0.01                    | -2.22           | 0.05              | 0.04 | 0.04 | 0.00            | 0.00            |
| 1.04            | 1.14            |       |     | 1.4               | 0.07              | 0.06 | 0.06 | 0.22            | 0.17                                      | 0.18 | 0.17 | 1.00                                      | 1.00 | 1.00 | 0.28              | 0.28 | 0.28  | -0.02                    | -2.21           | 0.10              | 0.10 | 0.10 | 0.01            | 0.01            |
| 1.06            | 1.22            |       |     | 1.6               | 0.08              | 0.09 | 0.08 | 0.36            | 0.32                                      | 0.33 | 0.32 | 1.00                                      | 1.00 | 1.00 | 0.39              | 0.39 | 0.39  | -0.04                    | -2.20           | 0.18              | 0.17 | 0.17 | 0.01            | 0.01            |
| 1.08            | 1.29            |       |     | 1.8               | 0.12              | 0.12 | 0.11 | 0.57            | 0.52                                      | 0.53 | 0.52 | 1.00                                      | 1.00 | 1.00 | 0.48              | 0.48 | 0.48  | -0.05                    | -2.20           | 0.26              | 0.25 | 0.25 | 0.02            | 0.02            |
| 1.00            | 1.00            | 0.6   | 1.0 | 1.0               | 0.05              | 0.05 | 0.05 | 0.07            | 0.06                                      | 0.06 | 0.06 | 1.00                                      | 1.00 | 1.00 | 0.00              | 0.00 | 0.00  | 0.00                     | -2.62           | 0.03              | 0.03 | 0.03 | 0.00            | 0.00            |
| 1.02            | 1.07            |       |     | 1.2               | 0.06              | 0.05 | 0.05 | 0.13            | 0.11                                      | 0.11 | 0.11 | 1.00                                      | 1.00 | 1.00 | 0.14              | 0.14 | 0.14  | -0.02                    | -2.67           | 0.05              | 0.05 | 0.05 | 0.01            | 0.01            |
| 1.04            | 1.14            |       |     | 1.4               | 0.07              | 0.07 | 0.07 | 0.28            | 0.23                                      | 0.23 | 0.23 | 1.00                                      | 1.00 | 1.00 | 0.25              | 0.25 | 0.25  | -0.04                    | -2.73           | 0.10              | 0.09 | 0.09 | 0.01            | 0.01            |
| 1.06            | 1.22            |       |     | 1.6               | 0.10              | 0.10 | 0.10 | 0.51            | 0.46                                      | 0.45 | 0.45 | 1.00                                      | 1.00 | 1.00 | 0.34              | 0.34 | 0.34  | -0.06                    | -2.80           | 0.16              | 0.15 | 0.15 | 0.02            | 0.02            |
| 1.08            | 1.29            |       |     | 1.8               | 0.12              | 0.13 | 0.12 | 0.73            | 0.68                                      | 0.68 | 0.68 | 1.00                                      | 1.00 | 1.00 | 0.43              | 0.42 | 0.42  | -0.08                    | -2.89           | 0.23              | 0.22 | 0.22 | 0.03            | 0.03            |
| 1.00            | 1.00            | 0.8   | 0.6 | 1.0               | 0.06              | 0.05 | 0.04 | 0.07            | 0.07                                      | 0.06 | 0.06 | 1.00                                      | 1.00 | 1.00 | 0.00              | 0.00 | 0.00  | 0.00                     | -1.07           | 0.02              | 0.01 | 0.01 | 0.00            | 0.00            |
| 1.02            | 1.07            |       |     | 1.2               | 0.07              | 0.07 | 0.05 | 0.09            | 0.10                                      | 0.10 | 0.09 | 1.00                                      | 1.00 | 1.00 | 0.15              | 0.14 | 0.14  | -0.01                    | -1.02           | 0.04              | 0.03 | 0.03 | 0.00            | 0.00            |
| 1.04            | 1.14            |       |     | 1.4               | 0.09              | 0.15 | 0.10 | 0.18            | 0.18                                      | 0.22 | 0.18 | 1.00                                      | 1.00 | 1.00 | 0.26              | 0.26 | 0.26  | -0.02                    | -0.98           | 0.09              | 0.08 | 0.08 | 0.01            | 0.01            |
| 1.06            | 1.22            |       |     | 1.6               | 0.14              | 0.26 | 0.18 | 0.32            | 0.33                                      | 0.41 | 0.36 | 1.00                                      | 1.00 | 1.00 | 0.36              | 0.36 | 0.36  | -0.03                    | -0.94           | 0.15              | 0.14 | 0.14 | 0.01            | 0.01            |
| 1.08            | 1.29            |       |     | 1.8               | 0.20              | 0.40 | 0.28 | 0.49            | 0.51                                      | 0.63 | 0.57 | 1.00                                      | 1.00 | 1.00 | 0.45              | 0.45 | 0.45  | -0.04                    | -0.90           | 0.22              | 0.21 | 0.21 | 0.02            | 0.02            |
| 1.00            | 1.00            | 0.8   | 0.8 | 1.0               | 0.06              | 0.05 | 0.04 | 0.07            | 0.08                                      | 0.07 | 0.07 | 1.00                                      | 1.00 | 1.00 | 0.00              | 0.00 | 0.00  | 0.00                     | -1.13           | 0.02              | 0.01 | 0.01 | 0.00            | 0.00            |
| 1.02            | 1.07            |       |     | 1.2               | 0.09              | 0.11 | 0.08 | 0.11            | 0.12                                      | 0.13 | 0.11 | 1.00                                      | 1.00 | 1.00 | 0.13              | 0.13 | 0.13  | -0.01                    | -1.09           | 0.03              | 0.02 | 0.03 | 0.01            | 0.01            |
| 1.04            | 1.14            |       |     | 1.4               | 0.14              | 0.24 | 0.17 | 0.22            | 0.25                                      | 0.33 | 0.28 | 1.00                                      | 1.00 | 1.00 | 0.23              | 0.23 | 0.23  | -0.03                    | -1.05           | 0.07              | 0.06 | 0.06 | 0.01            | 0.01            |
| 1.06            | 1.22            |       |     | 1.6               | 0.23              | 0.45 | 0.33 | 0.41            | 0.47                                      | 0.62 | 0.53 | 1.00                                      | 1.00 | 1.00 | 0.32              | 0.32 | 0.32  | -0.04                    | -1.03           | 0.12              | 0.11 | 0.11 | 0.01            | 0.01            |
| 1.08            | 1.29            |       |     | 1.8               | 0.36              | 0.67 | 0.52 | 0.61            | 0.70                                      | 0.84 | 0.77 | 1.00                                      | 1.00 | 1.00 | 0.39              | 0.39 | 0.39  | -0.05                    | -0.99           | 0.17              | 0.16 | 0.16 | 0.02            | 0.02            |
| 1.00            | 1.00            | 0.8   | 1.0 | 1.0               | 0.06              | 0.05 | 0.04 | 0.08            | 0.07                                      | 0.06 | 0.06 | 1.00                                      | 1.00 | 1.00 | 0.00              | 0.00 | 0.00  | 0.00                     | -1.19           | 0.02              | 0.01 | 0.01 | 0.00            | 0.00            |
| 1.02            | 1.07            |       |     | 1.2               | 0.09              | 0.13 | 0.10 | 0.12            | 0.14                                      | 0.17 | 0.14 | 1.00                                      | 1.00 | 1.00 | 0.11              | 0.11 | 0.11  | -0.02                    | -1.16           | 0.03              | 0.02 | 0.02 | 0.01            | 0.01            |
| 1.04            | 1.14            |       |     | 1.4               | 0.20              | 0.36 | 0.26 | 0.28            | 0.33                                      | 0.45 | 0.38 | 1.00                                      | 1.00 | 1.00 | 0.20              | 0.20 | 0.20  | -0.04                    | -1.14           | 0.06              | 0.05 | 0.05 | 0.01            | 0.01            |
| 1.06            | 1.22            |       |     | 1.6               | 0.35              | 0.65 | 0.51 | 0.51            | 0.62                                      | 0.77 | 0.70 | 1.00                                      | 1.00 | 1.00 | 0.27              | 0.27 | 0.27  | -0.06                    | -1.12           | 0.09              | 0.08 | 0.08 | 0.02            | 0.02            |
| 1.08            | 1.29            |       |     | 1.8               | 0.51              | 0.84 | 0.69 | 0.72            | 0.86                                      | 0.95 | 0.91 | 1.00                                      | 1.00 | 1.00 | 0.34              | 0.34 | 0.34  | -0.08                    | -1.10           | 0.13              | 0.12 | 0.12 | 0.03            | 0.03            |
| 1.00            | 1.00            | 1.0   | 0.6 | 1.0               | 0.05              | 0.06 | 0.04 | 0.08            | 0.07                                      | 0.07 | 0.06 | 1.00                                      | 1.00 | 1.00 | 0.00              | 0.00 | 0.00  | 0.00                     | -0.76           | 0.05              | 0.02 | 0.03 | 0.00            | 0.00            |
| 1.02            | 1.07            |       |     | 1.2               | 0.13              | 0.30 | 0.18 | 0.10            | 0.15                                      | 0.28 | 0.19 | 1.00                                      | 1.00 | 1.00 | 0.01              | 0.01 | 0.01  | -0.01                    | -0.76           | 0.05              | 0.02 | 0.03 | 0.01            | 0.01            |
| 1.04            | 1.14            |       |     | 1.4               | 0.32              | 0.76 | 0.53 | 0.20            | 0.38                                      | 0.74 | 0.54 | 1.00                                      | 1.00 | 1.00 | 0.02              | 0.02 | 0.02  | -0.02                    | -0.77           | 0.05              | 0.01 | 0.03 | 0.01            | 0.01            |
| 1.06            | 1.22            |       |     | 1.6               | 0.58              | 0.97 | 0.79 | 0.36            | 0.66                                      | 0.97 | 0.83 | 1.00                                      | 1.00 | 1.00 | 0.02              | 0.03 | 0.02  | -0.03                    | -0.77           | 0.05              | 0.01 | 0.03 | 0.01            | 0.01            |
| 1.08            | 1.29            |       |     | 1.8               | 0.76              | 1.00 | 0.90 | 0.55            | 0.86                                      | 1.00 | 0.94 | 1.00                                      | 1.00 | 1.00 | 0.03              | 0.03 | 0.03  | -0.04                    | -0.77           | 0.05              | 0.01 | 0.03 | 0.02            | 0.02            |
| 1.00            | 1.00            | 1.0   | 0.8 | 1.0               | 0.06              | 0.05 | 0.04 | 0.08            | 0.07                                      | 0.07 | 0.06 | 1.00                                      | 1.00 | 1.00 | 0.00              | 0.00 | 0.00  | 0.00                     | -0.79           | 0.04              | 0.01 | 0.02 | 0.00            | 0.00            |
| 1.02            | 1.07            |       |     | 1.2               | 0.15              | 0.37 | 0.23 | 0.12            | 0.17                                      | 0.35 | 0.23 | 1.00                                      | 1.00 | 1.00 | 0.01              | 0.01 | 0.01  | -0.01                    | -0.79           | 0.04              | 0.01 | 0.02 | 0.01            | 0.01            |
| 1.04            | 1.14            |       |     | 1.4               | 0.42              | 0.88 | 0.66 | 0.24            | 0.48                                      | 0.85 | 0.67 | 1.00                                      | 1.00 | 1.00 | 0.00              | 0.01 | 0.01  | -0.03                    | -0.79           | 0.04              | 0.01 | 0.02 | 0.01            | 0.01            |
| 1.06            | 1.22            |       |     | 1.6               | 0.71              | 0.99 | 0.87 | 0.44            | 0.80                                      | 0.99 | 0.91 | 1.00                                      | 1.00 | 1.00 | 0.01              | 0.01 | 0.01  | -0.04                    | -0.80           | 0.04              | 0.01 | 0.02 | 0.02            | 0.02            |
| 1.08            | 1.29            |       |     | 1.8               | 0.87              | 1.00 | 0.94 | 0.63            | 0.95                                      | 1.00 | 0.98 | 1.00                                      | 1.00 | 1.00 | 0.02              | 0.02 | 0.02  | -0.06                    | -0.81           | 0.04              | 0.01 | 0.02 | 0.02            | 0.02            |
| 1.00            | 1.00            | 1.0   | 1.0 | 1.0               | 0.05              | 0.05 | 0.03 | 0.07            | 0.07                                      | 0.07 | 0.06 | 1.00                                      | 1.00 | 1.00 | 0.00              | 0.00 | 0.00  | 0.00                     | -0.81           | 0.03              | 0.01 | 0.02 | 0.00            | 0.00            |
| 1.02            | 1.07            |       |     | 1.2               | 0.20              | 0.45 | 0.29 | 0.13            | 0.22                                      | 0.43 | 0.29 | 1.00                                      | 1.00 | 1.00 | 0.00              | 0.00 | 0.00  | -0.02                    | -0.82           | 0.03              | 0.01 | 0.02 | 0.01            | 0.01            |
| 1.04            | 1.14            |       |     | 1.4               | 0.52              | 0.92 | 0.73 | 0.29            | 0.58                                      | 0.92 | 0.76 | 1.00                                      | 1.00 | 1.00 | 0.00              | 0.00 | 0.00  | -0.04                    | -0.83           | 0.03              | 0.01 | 0.02 | 0.01            | 0.01            |
| 1.06            | 1.22            |       |     | 1.6               | 0.81              | 1.00 | 0.91 | 0.51            | 0.88                                      | 1.00 | 0.95 | 1.00                                      | 1.00 | 1.00 | -0.01             | 0.00 | -0.01 | -0.06                    | -0.84           | 0.03              | 0.01 | 0.02 | 0.02            | 0.02            |
| 1.08            | 1.29            |       |     | 1.8               | 0.94              | 1.00 | 0.97 | 0.72            | 0.98                                      | 1.00 | 0.99 | 1.00                                      | 1.00 | 1.00 | 0.00              | 0.00 | 0.00  | -0.08                    | -0.85           | 0.03              | 0.01 | 0.02 | 0.03            | 0.03            |



**Supplementary Table 9.** Estimated power and bias for Scheme 3 with exposure misclassification. 3 methods of GxE interaction detection are applied based on 5000 simulated datasets, each including 5000 cases and 5000 controls from which 50% are selected for genotyping at a single marker. Exposure prevalence = 0.1;  $OR_{ge} = 1.0$ ;  $OR_g = 1.0$ ;  $OR_e = 1.0$ . Scheme 3: Randomly sample 50% of cases and 50% of controls for genotyping, irrespective of exposure status.

|        |        | Power      |     |            |        |                         |      |      |                         |      |      |            | Bias |      |        |        |            | Mean squared error (MSE) |      |        |        |      |      |      |
|--------|--------|------------|-----|------------|--------|-------------------------|------|------|-------------------------|------|------|------------|------|------|--------|--------|------------|--------------------------|------|--------|--------|------|------|------|
|        |        | $OR_{gxe}$ |     |            | $MA_g$ | Joint $MA_g + OR_{gxe}$ |      |      | Joint $MA_e + OR_{gxe}$ |      |      | $OR_{gxe}$ |      |      | $MA_g$ | $MA_e$ | $OR_{gxe}$ |                          |      | $MA_g$ | $MA_e$ |      |      |      |
| $MA_g$ | $MA_e$ | SP         | SE  | $OR_{gxe}$ | CC     | CO                      | EB   | CC   | CO                      | EB   | CC   | CO         | EB   | CC   | CO     | EB     | All        | All                      | CC   | CO     | EB     | All  | All  |      |
| 1.00   | 1.00   | 0.6        | 0.6 | 1.0        | 0.05   | 0.05                    | 0.04 | 0.05 | 0.05                    | 0.05 | 0.04 | 0.04       | 0.04 | 0.03 | 0.00   | 0.00   | 0.00       | 0.00                     | 0.01 | 0.01   | 0.01   | 0.00 | 0.00 |      |
| 1.02   | 1.07   |            |     | 1.2        | 0.06   | 0.05                    | 0.04 | 0.06 | 0.06                    | 0.06 | 0.06 | 0.05       | 0.06 | 0.05 | 0.17   | 0.17   | 0.17       | 0.00                     | 0.06 | 0.04   | 0.04   | 0.04 | 0.00 | 0.00 |
| 1.04   | 1.14   |            |     | 1.4        | 0.06   | 0.07                    | 0.06 | 0.10 | 0.09                    | 0.10 | 0.09 | 0.06       | 0.07 | 0.06 | 0.30   | 0.31   | 0.31       | 0.00                     | 0.12 | 0.11   | 0.10   | 0.10 | 0.00 | 0.00 |
| 1.06   | 1.22   |            |     | 1.6        | 0.07   | 0.08                    | 0.07 | 0.17 | 0.15                    | 0.16 | 0.14 | 0.07       | 0.08 | 0.07 | 0.42   | 0.43   | 0.43       | 0.00                     | 0.18 | 0.20   | 0.19   | 0.19 | 0.01 | 0.01 |
| 1.08   | 1.29   |            |     | 1.8        | 0.07   | 0.10                    | 0.07 | 0.27 | 0.22                    | 0.24 | 0.22 | 0.07       | 0.09 | 0.07 | 0.53   | 0.53   | 0.53       | 0.00                     | 0.23 | 0.30   | 0.29   | 0.29 | 0.01 | 0.01 |
| 1.00   | 1.00   | 0.6        | 0.8 | 1.0        | 0.06   | 0.05                    | 0.04 | 0.05 | 0.05                    | 0.05 | 0.04 | 0.05       | 0.05 | 0.04 | 0.00   | 0.00   | 0.00       | 0.00                     | 0.00 | 0.01   | 0.01   | 0.01 | 0.00 | 0.00 |
| 1.02   | 1.07   |            |     | 1.2        | 0.06   | 0.07                    | 0.05 | 0.06 | 0.07                    | 0.07 | 0.06 | 0.06       | 0.06 | 0.05 | 0.15   | 0.15   | 0.15       | 0.00                     | 0.06 | 0.04   | 0.03   | 0.03 | 0.00 | 0.00 |
| 1.04   | 1.14   |            |     | 1.4        | 0.07   | 0.11                    | 0.08 | 0.10 | 0.10                    | 0.13 | 0.10 | 0.08       | 0.10 | 0.08 | 0.28   | 0.28   | 0.28       | 0.00                     | 0.12 | 0.09   | 0.09   | 0.09 | 0.00 | 0.00 |
| 1.06   | 1.22   |            |     | 1.6        | 0.11   | 0.17                    | 0.13 | 0.17 | 0.18                    | 0.22 | 0.19 | 0.11       | 0.15 | 0.13 | 0.39   | 0.39   | 0.39       | 0.00                     | 0.17 | 0.16   | 0.16   | 0.16 | 0.01 | 0.01 |
| 1.08   | 1.29   |            |     | 1.8        | 0.15   | 0.26                    | 0.20 | 0.26 | 0.29                    | 0.37 | 0.32 | 0.18       | 0.25 | 0.20 | 0.48   | 0.48   | 0.48       | 0.00                     | 0.21 | 0.24   | 0.24   | 0.24 | 0.01 | 0.01 |
| 1.00   | 1.00   | 0.6        | 1.0 | 1.0        | 0.05   | 0.05                    | 0.04 | 0.05 | 0.05                    | 0.05 | 0.04 | 0.05       | 0.05 | 0.05 | 0.00   | 0.00   | 0.00       | 0.00                     | 0.00 | 0.01   | 0.01   | 0.01 | 0.00 | 0.00 |
| 1.02   | 1.07   |            |     | 1.2        | 0.06   | 0.07                    | 0.06 | 0.06 | 0.06                    | 0.07 | 0.06 | 0.06       | 0.07 | 0.06 | 0.14   | 0.14   | 0.14       | 0.00                     | 0.05 | 0.03   | 0.03   | 0.03 | 0.00 | 0.00 |
| 1.04   | 1.14   |            |     | 1.4        | 0.11   | 0.18                    | 0.14 | 0.10 | 0.13                    | 0.18 | 0.15 | 0.11       | 0.16 | 0.13 | 0.25   | 0.25   | 0.25       | 0.00                     | 0.10 | 0.08   | 0.07   | 0.07 | 0.01 | 0.01 |
| 1.06   | 1.22   |            |     | 1.6        | 0.18   | 0.32                    | 0.24 | 0.17 | 0.22                    | 0.33 | 0.27 | 0.20       | 0.31 | 0.24 | 0.35   | 0.35   | 0.35       | 0.00                     | 0.15 | 0.13   | 0.13   | 0.13 | 0.01 | 0.01 |
| 1.08   | 1.29   |            |     | 1.8        | 0.28   | 0.49                    | 0.39 | 0.27 | 0.39                    | 0.55 | 0.47 | 0.33       | 0.50 | 0.42 | 0.43   | 0.43   | 0.43       | 0.00                     | 0.19 | 0.20   | 0.19   | 0.19 | 0.01 | 0.01 |
| 1.00   | 1.00   | 0.8        | 0.6 | 1.0        | 0.05   | 0.05                    | 0.04 | 0.05 | 0.05                    | 0.05 | 0.04 | 0.05       | 0.05 | 0.04 | 0.00   | 0.00   | 0.00       | 0.00                     | 0.00 | 0.02   | 0.01   | 0.01 | 0.00 | 0.00 |
| 1.02   | 1.07   |            |     | 1.2        | 0.06   | 0.07                    | 0.05 | 0.06 | 0.06                    | 0.07 | 0.06 | 0.06       | 0.07 | 0.05 | 0.14   | 0.14   | 0.14       | 0.00                     | 0.05 | 0.04   | 0.03   | 0.03 | 0.00 | 0.00 |
| 1.04   | 1.14   |            |     | 1.4        | 0.08   | 0.12                    | 0.09 | 0.10 | 0.10                    | 0.14 | 0.11 | 0.09       | 0.11 | 0.09 | 0.26   | 0.26   | 0.26       | 0.00                     | 0.11 | 0.09   | 0.08   | 0.08 | 0.00 | 0.00 |
| 1.06   | 1.22   |            |     | 1.6        | 0.12   | 0.21                    | 0.16 | 0.18 | 0.19                    | 0.26 | 0.21 | 0.13       | 0.20 | 0.16 | 0.36   | 0.36   | 0.36       | 0.00                     | 0.15 | 0.15   | 0.14   | 0.14 | 0.01 | 0.01 |
| 1.08   | 1.29   |            |     | 1.8        | 0.17   | 0.32                    | 0.24 | 0.26 | 0.29                    | 0.41 | 0.35 | 0.20       | 0.31 | 0.25 | 0.45   | 0.45   | 0.45       | 0.00                     | 0.20 | 0.22   | 0.21   | 0.21 | 0.01 | 0.01 |
| 1.00   | 1.00   | 0.8        | 0.8 | 1.0        | 0.06   | 0.05                    | 0.04 | 0.05 | 0.05                    | 0.05 | 0.05 | 0.05       | 0.05 | 0.05 | 0.00   | 0.00   | 0.00       | 0.00                     | 0.00 | 0.02   | 0.01   | 0.01 | 0.00 | 0.00 |
| 1.02   | 1.07   |            |     | 1.2        | 0.07   | 0.09                    | 0.07 | 0.06 | 0.07                    | 0.09 | 0.07 | 0.06       | 0.08 | 0.07 | 0.13   | 0.13   | 0.13       | 0.00                     | 0.05 | 0.03   | 0.03   | 0.03 | 0.00 | 0.00 |
| 1.04   | 1.14   |            |     | 1.4        | 0.12   | 0.21                    | 0.15 | 0.11 | 0.14                    | 0.21 | 0.16 | 0.13       | 0.20 | 0.15 | 0.23   | 0.23   | 0.23       | 0.00                     | 0.10 | 0.07   | 0.06   | 0.07 | 0.01 | 0.01 |
| 1.06   | 1.22   |            |     | 1.6        | 0.22   | 0.40                    | 0.31 | 0.17 | 0.25                    | 0.40 | 0.33 | 0.24       | 0.39 | 0.31 | 0.32   | 0.32   | 0.32       | 0.00                     | 0.14 | 0.12   | 0.11   | 0.11 | 0.01 | 0.01 |
| 1.08   | 1.29   |            |     | 1.8        | 0.31   | 0.58                    | 0.46 | 0.26 | 0.40                    | 0.61 | 0.51 | 0.38       | 0.59 | 0.49 | 0.39   | 0.39   | 0.39       | 0.00                     | 0.17 | 0.17   | 0.16   | 0.16 | 0.01 | 0.01 |
| 1.00   | 1.00   | 0.8        | 1.0 | 1.0        | 0.05   | 0.05                    | 0.04 | 0.06 | 0.05                    | 0.05 | 0.04 | 0.05       | 0.05 | 0.04 | 0.00   | 0.00   | 0.00       | 0.00                     | 0.00 | 0.02   | 0.01   | 0.01 | 0.00 | 0.00 |
| 1.02   | 1.07   |            |     | 1.2        | 0.08   | 0.11                    | 0.08 | 0.06 | 0.07                    | 0.11 | 0.09 | 0.08       | 0.11 | 0.09 | 0.12   | 0.11   | 0.12       | 0.00                     | 0.04 | 0.03   | 0.02   | 0.02 | 0.00 | 0.00 |
| 1.04   | 1.14   |            |     | 1.4        | 0.17   | 0.31                    | 0.23 | 0.10 | 0.17                    | 0.28 | 0.22 | 0.19       | 0.31 | 0.25 | 0.20   | 0.20   | 0.20       | 0.00                     | 0.08 | 0.06   | 0.05   | 0.05 | 0.01 | 0.01 |
| 1.06   | 1.22   |            |     | 1.6        | 0.31   | 0.58                    | 0.45 | 0.17 | 0.33                    | 0.55 | 0.45 | 0.37       | 0.58 | 0.48 | 0.28   | 0.28   | 0.28       | 0.00                     | 0.12 | 0.09   | 0.09   | 0.09 | 0.01 | 0.01 |
| 1.08   | 1.29   |            |     | 1.8        | 0.50   | 0.80                    | 0.68 | 0.26 | 0.54                    | 0.80 | 0.69 | 0.61       | 0.83 | 0.74 | 0.34   | 0.34   | 0.34       | 0.00                     | 0.16 | 0.13   | 0.12   | 0.12 | 0.01 | 0.01 |
| 1.00   | 1.00   | 1.0        | 0.6 | 1.0        | 0.05   | 0.05                    | 0.04 | 0.05 | 0.05                    | 0.05 | 0.04 | 0.06       | 0.05 | 0.04 | 0.00   | 0.00   | 0.00       | 0.00                     | 0.00 | 0.06   | 0.03   | 0.04 | 0.00 | 0.00 |
| 1.02   | 1.07   |            |     | 1.2        | 0.11   | 0.18                    | 0.13 | 0.06 | 0.11                    | 0.16 | 0.12 | 0.12       | 0.17 | 0.13 | 0.01   | 0.01   | 0.01       | 0.00                     | 0.00 | 0.06   | 0.03   | 0.04 | 0.00 | 0.00 |
| 1.04   | 1.14   |            |     | 1.4        | 0.26   | 0.51                    | 0.38 | 0.10 | 0.24                    | 0.45 | 0.34 | 0.31       | 0.52 | 0.42 | 0.02   | 0.02   | 0.02       | 0.00                     | 0.00 | 0.06   | 0.03   | 0.04 | 0.00 | 0.00 |
| 1.06   | 1.22   |            |     | 1.6        | 0.48   | 0.81                    | 0.67 | 0.16 | 0.47                    | 0.78 | 0.63 | 0.61       | 0.84 | 0.74 | 0.02   | 0.03   | 0.02       | 0.00                     | 0.01 | 0.06   | 0.03   | 0.04 | 0.01 | 0.01 |
| 1.08   | 1.29   |            |     | 1.8        | 0.66   | 0.95                    | 0.84 | 0.26 | 0.68                    | 0.94 | 0.84 | 0.82       | 0.97 | 0.92 | 0.04   | 0.04   | 0.04       | 0.00                     | 0.01 | 0.06   | 0.02   | 0.04 | 0.01 | 0.01 |
| 1.00   | 1.00   | 1.0        | 0.8 | 1.0        | 0.05   | 0.05                    | 0.04 | 0.05 | 0.05                    | 0.04 | 0.04 | 0.05       | 0.05 | 0.04 | 0.00   | 0.01   | 0.00       | 0.00                     | 0.00 | 0.05   | 0.02   | 0.03 | 0.00 | 0.00 |
| 1.02   | 1.07   |            |     | 1.2        | 0.13   | 0.23                    | 0.17 | 0.06 | 0.12                    | 0.18 | 0.14 | 0.14       | 0.21 | 0.17 | 0.00   | 0.01   | 0.00       | 0.00                     | 0.00 | 0.05   | 0.02   | 0.03 | 0.00 | 0.00 |
| 1.04   | 1.14   |            |     | 1.4        | 0.35   | 0.64                    | 0.51 | 0.11 | 0.32                    | 0.57 | 0.44 | 0.43       | 0.64 | 0.54 | 0.01   | 0.01   | 0.01       | 0.00                     | 0.00 | 0.04   | 0.02   | 0.03 | 0.01 | 0.01 |
| 1.06   | 1.22   |            |     | 1.6        | 0.60   | 0.91                    | 0.79 | 0.17 | 0.59                    | 0.89 | 0.76 | 0.75       | 0.93 | 0.87 | 0.01   | 0.01   | 0.01       | 0.00                     | 0.00 | 0.04   | 0.02   | 0.03 | 0.01 | 0.01 |
| 1.08   | 1.29   |            |     | 1.8        | 0.82   | 0.99                    | 0.92 | 0.26 | 0.80                    | 0.98 | 0.92 | 0.94       | 1.00 | 0.98 | 0.01   | 0.02   | 0.01       | 0.00                     | 0.01 | 0.04   | 0.02   | 0.03 | 0.01 | 0.01 |
| 1.00   | 1.00   | 1.0        | 1.0 | 1.0        | 0.05   | 0.05                    | 0.04 | 0.05 | 0.05                    | 0.05 | 0.04 | 0.04       | 0.05 | 0.04 | 0.00   | 0.00   | 0.00       | 0.00                     | 0.00 | 0.04   | 0.02   | 0.03 | 0.00 | 0.00 |
| 1.02   | 1.07   |            |     | 1.2        | 0.16   | 0.28                    | 0.21 | 0.07 | 0.14                    | 0.22 | 0.17 | 0.18       | 0.26 | 0.21 | 0.00   | 0.00   | 0.00       | 0.00                     | 0.00 | 0.04   | 0.02   | 0.02 | 0.00 | 0.00 |
| 1.04   | 1.14   |            |     | 1.4        | 0.43   | 0.75                    | 0.62 | 0.10 | 0.38                    | 0.68 | 0.54 | 0.54       | 0.77 | 0.67 | 0.00   | 0.00   | 0.00       | 0.00                     | 0.00 | 0.03   | 0.02   | 0.02 | 0.00 | 0.00 |
| 1.06   | 1.22   |            |     | 1.6        | 0.72   | 0.96                    | 0.87 | 0.16 | 0.68                    | 0.94 | 0.84 | 0.86       | 0.98 | 0.93 | 0.00   | 0.00   | 0.00       | 0.00                     | 0.00 | 0.04   | 0.02   | 0.02 | 0.01 | 0.01 |
| 1.08   | 1.29   |            |     | 1.8        | 0.90   | 1.00                    | 0.96 | 0.27 | 0.88                    | 1.00 | 0.96 | 0.98       | 1.00 | 0.99 | 0.00   | 0.00   | 0.00       | 0.00                     | 0.00 | 0.03   | 0.02   | 0.02 | 0.01 | 0.01 |

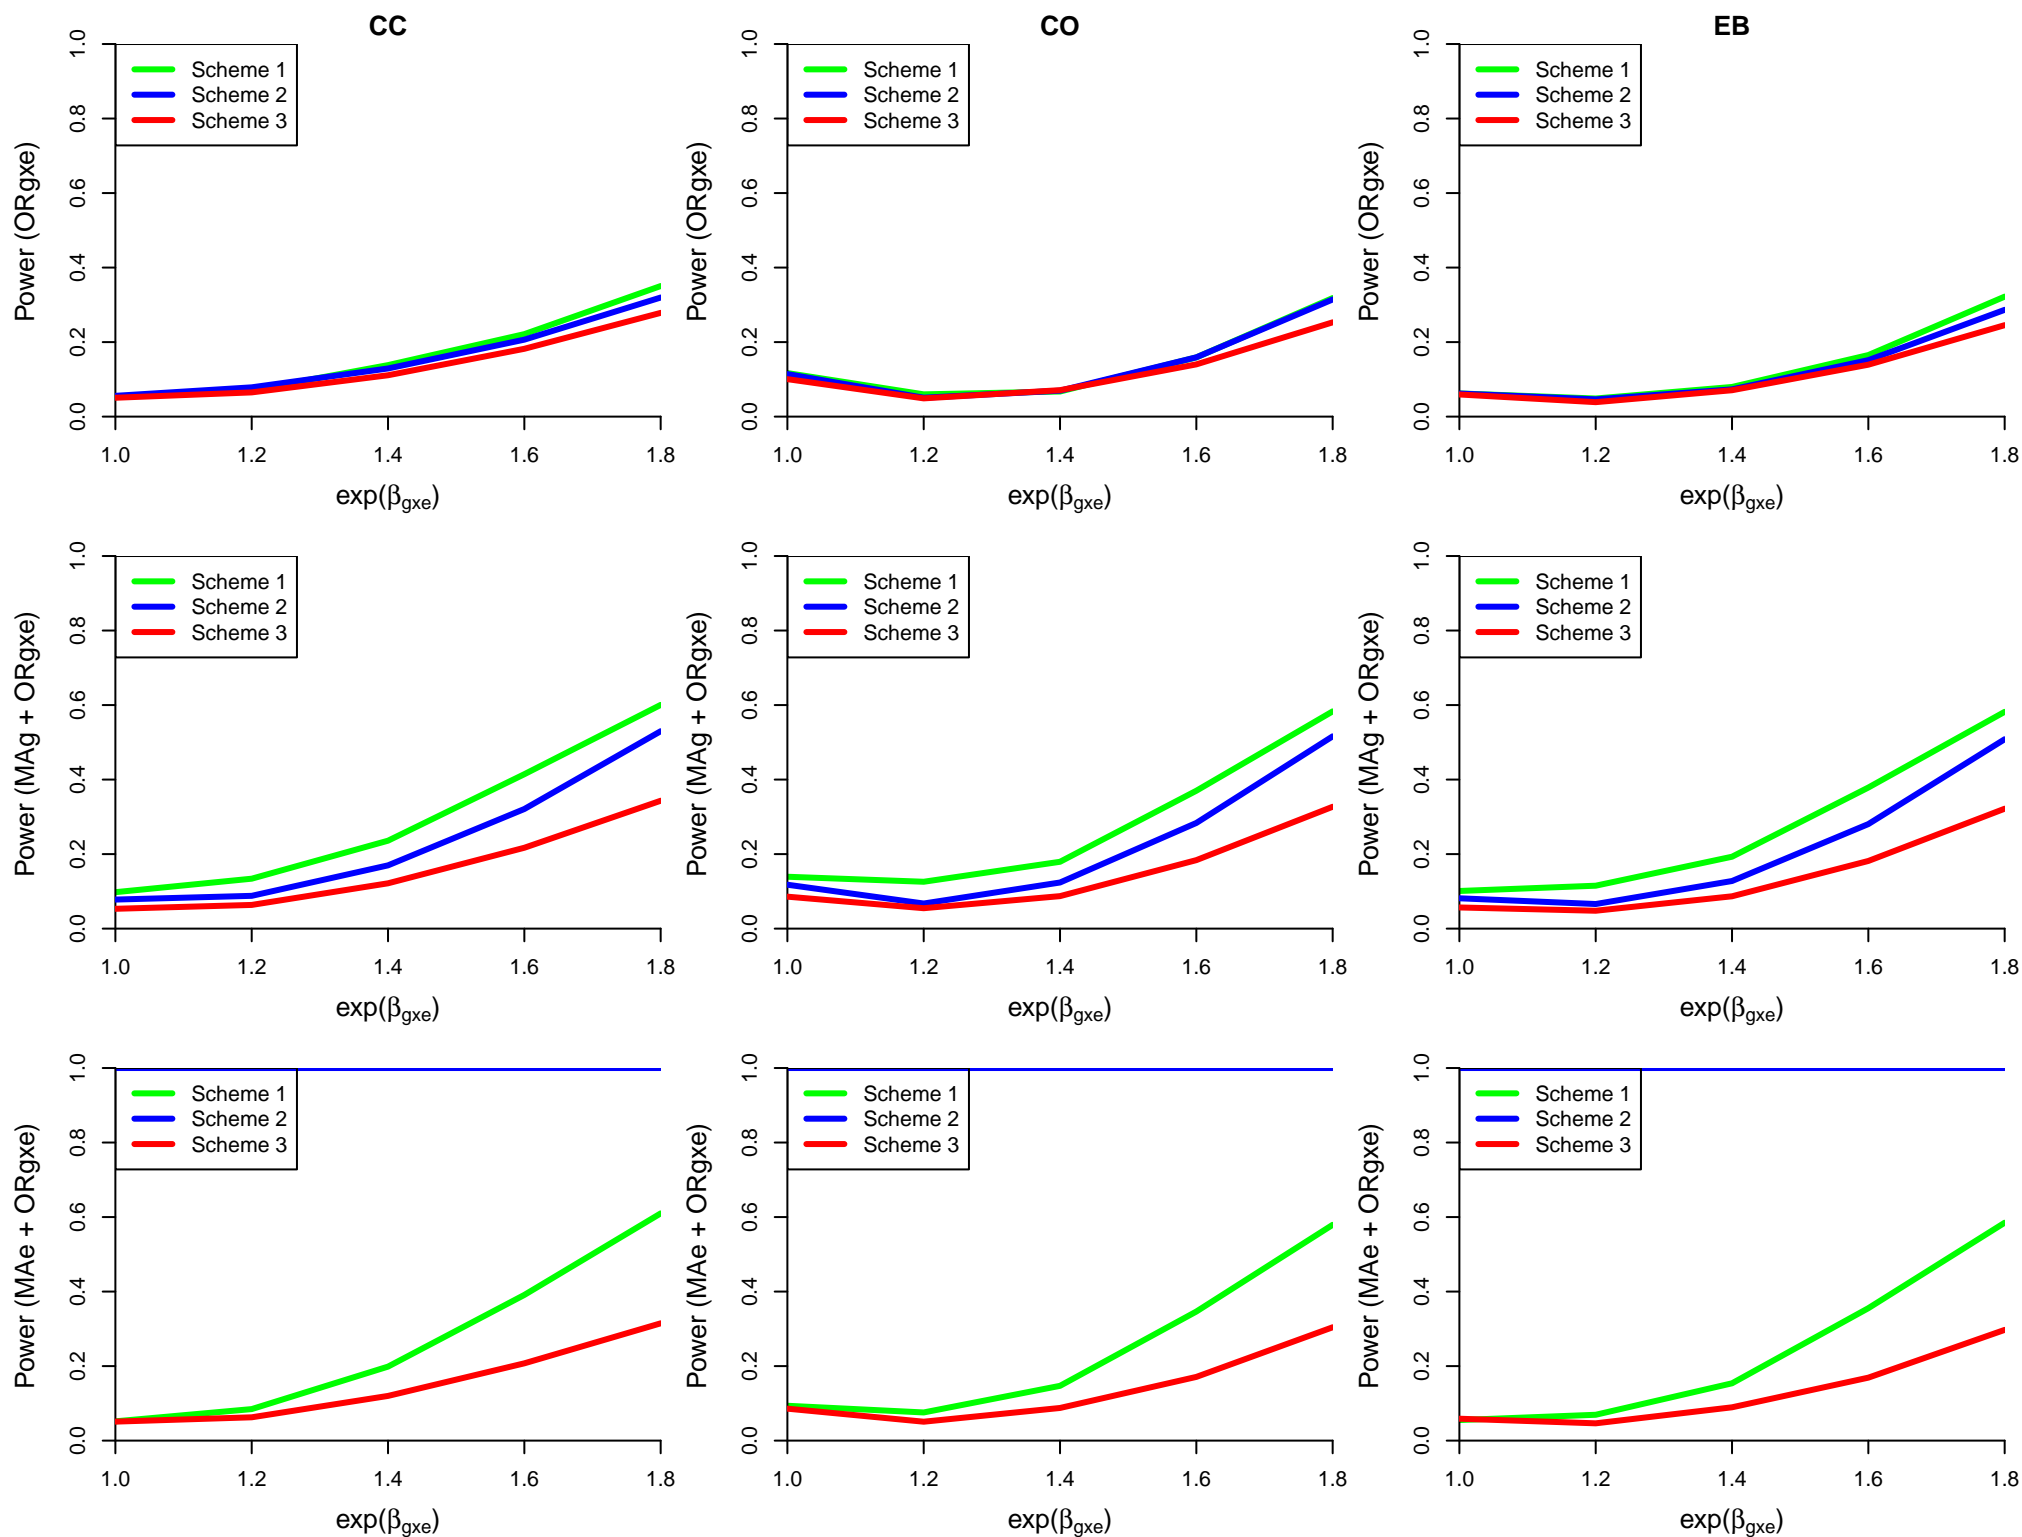

Supplementary Figure 1. Power comparison of three exposure-biased sampling designs with a violation of G-E independence and exposure misclassification (sensitivity = 0.8; specificity = 0.8). Each row represents one of three tests: GxE interaction (ORgxe), joint marginal G and G-E interaction (MAg + ORgxe), or joint marginal E and GxE interaction (MAe + ORgxe). Each column designates one of three different approaches for estimating the GxE interaction parameter (CC = case-control, CO = case-only, EB = Empirical Bayes). Based on 5000 simulated datasets, 2500 cases and 2500 controls, genotype information on 1 marker,  $OR_g = OR_e = 1$ , a  $D=0/E=1$  subsampling rate of 0.5 for Scheme 2, and  $OR_{gxe} = 0.8$ . Scheme 1: Genotype 50% of cases and 50% of controls including all  $E=1$  and a random sample of  $E=0$ . Scheme 2: Genotype 50% of cases and 50% of controls including all  $D=1/E=1$ , 50% of  $D=0/E=1$ , and a random sample of  $E=0$ . Scheme 3: Randomly sample 50% of cases and 50% of controls for genotyping, irrespective of exposure status.

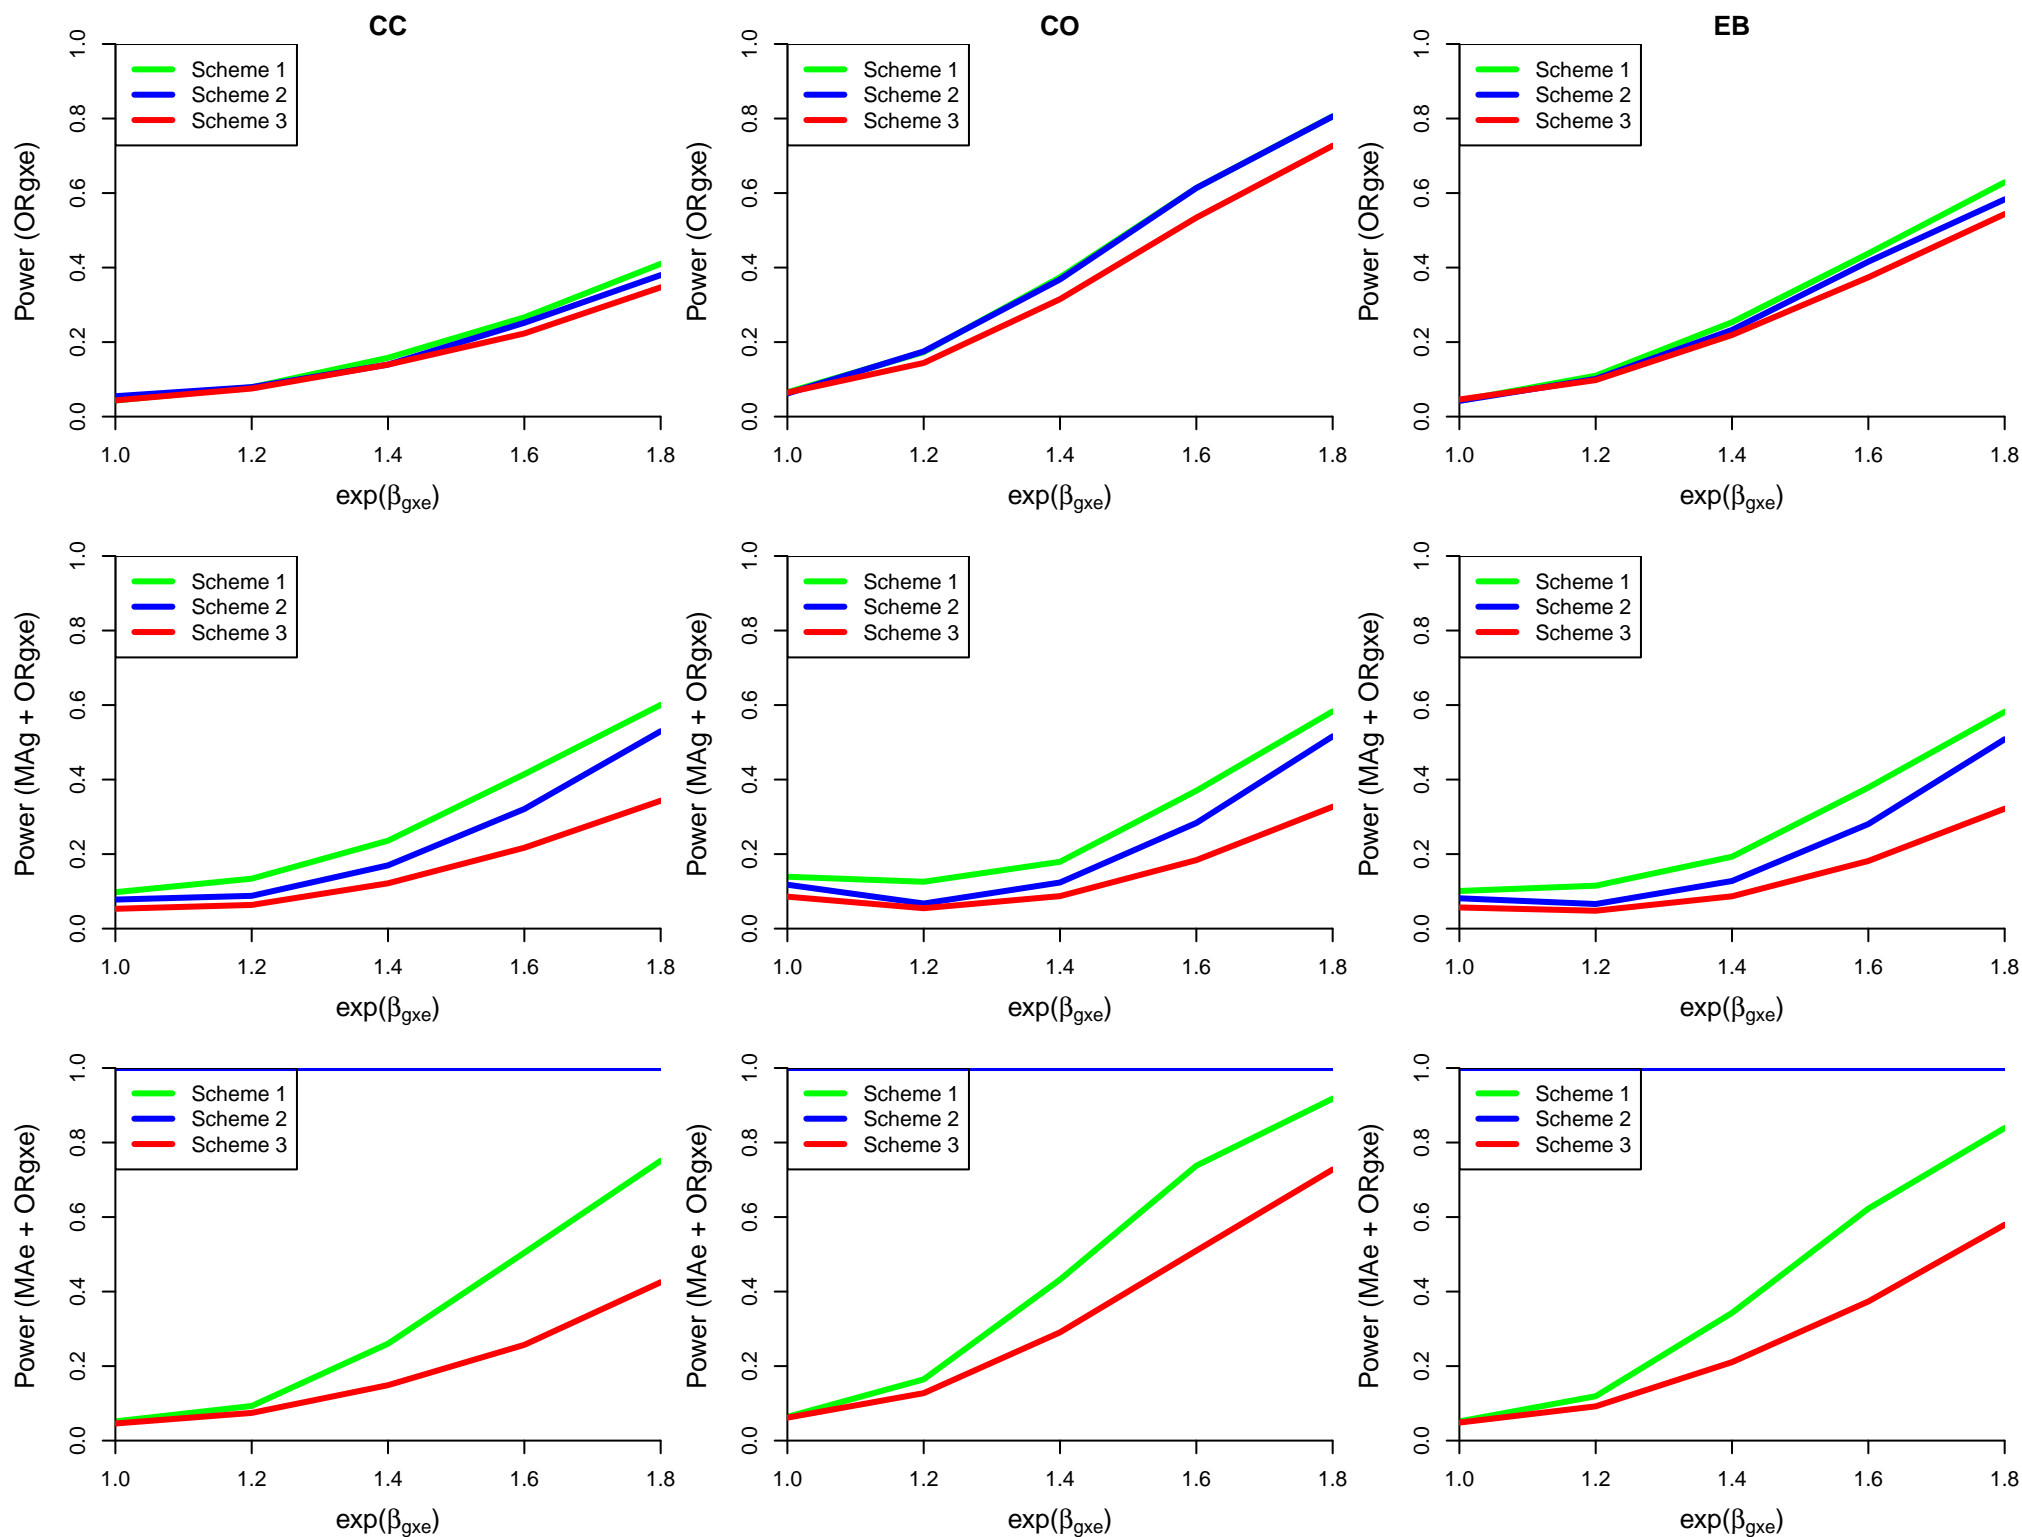

Supplementary Figure 2. Power comparison of three exposure-biased sampling designs with a violation of G-E independence and exposure misclassification (sensitivity = 0.8; specificity = 0.8). Each row represents one of three tests: GxE interaction ( $OR_{g^*e}$ ), joint marginal G and GxE interaction ( $MA_g + OR_{g^*e}$ ), or joint marginal E and G-E interaction ( $MA_e + OR_{g^*e}$ ). Each column designates one of three different approaches for estimating the G-E interaction parameter (CC = case-control, CO = case-only, EB = Empirical Bayes). Based on 5000 simulated datasets, 2500 cases and 2500 controls, genotype information on 1 marker,  $OR_g = OR_e = 1$ , a  $D=0/E=1$  subsampling rate of 0.5 for Scheme 2, and  $OR_{ge} = 1.1$ . Scheme 1: Genotype 50% of cases and 50% of controls including all  $E=1$  and a random sample of  $E=0$ . Scheme 2: Genotype 50% of cases and 50% of controls including all  $D=1/E=1$ , 50% of  $D=0/E=1$ , and a random sample of  $E=0$ . Scheme 3: Randomly sample 50% of cases and 50% of controls for genotyping, irrespective of exposure status.
